# Supplementary material for: Long COVID and menstruation: bidirectional associations and potential mechanisms.
Source: Research Square preprint supplement (doi:10.21203/rs.3.rs-5725816/v1), 2025-01-08
Supplement: Supplementary file 1 [file 5841723b96e9c36489aa296c.pdf]

**Table S7. Number of daily Long COVID symptoms across the menstrual cycle**

| <i>Predictors</i>                                    | <b>Number of distinct symptoms</b> |               |                  |
|------------------------------------------------------|------------------------------------|---------------|------------------|
|                                                      | <i>Incidence Rate Ratios</i>       | <i>CI</i>     | <i>p</i>         |
| (Intercept)                                          | 12.19                              | 10.05 – 14.80 | <b>&lt;0.001</b> |
| phase all [LS/M]                                     | 1.03                               | 0.99 – 1.07   | 0.148            |
| phase all [P]                                        | 1.00                               | 0.95 – 1.05   | 0.878            |
| age group [40 years+]                                | 1.03                               | 0.79 – 1.32   | 0.849            |
| <b>Random Effects</b>                                |                                    |               |                  |
| $\sigma^2$                                           | 0.07                               |               |                  |
| $\tau_{00}$ phase_all:id                             | 0.00                               |               |                  |
| $\tau_{00}$ id                                       | 0.21                               |               |                  |
| ICC                                                  | 0.75                               |               |                  |
| N <sub>phase_all</sub>                               | 3                                  |               |                  |
| N <sub>id</sub>                                      | 54                                 |               |                  |
| Observations                                         | 1333                               |               |                  |
| Marginal R <sup>2</sup> / Conditional R <sup>2</sup> | 0.001 / 0.755                      |               |                  |
